# Supplementary material for: Ultrasonic interfacial crosslinking of TiO2-based nanocomposite hydrogels through thiol–norbornene reactions for sonodynamic antibacterial treatment
Source: Royal Society of Chemistry journal article supplement (doi:10.1039/d2bm01950g), 2023-01-01
Supplement: d2bm01950g1.pdf [file d2bm01950g1.pdf]

## Supporting information

### **Ultrasonic interfacial crosslinking of TiO<sub>2</sub>-based nanocomposite hydrogels through thiol-norbornene reactions for sonodynamic antibacterial treatment**

Su-Rung Yang<sup>a, †</sup>, Reuben Wang<sup>b, c, d, †</sup>, Chen-Jie Yan<sup>a</sup>, Yi-Yun Lin<sup>a</sup>, Yu-Jia Yeh<sup>b</sup>, Ying-Yu Yeh<sup>a</sup>, and  
Yi-Cheun Yeh<sup>a\*</sup>

<sup>a</sup> Institute of Polymer Science and Engineering, National Taiwan University, Taipei, Taiwan

<sup>b</sup> Institute of Food Safety and Health, National Taiwan University, Taipei, Taiwan

<sup>c</sup> Master of Public Health Program, National Taiwan University, Taipei, Taiwan

<sup>d</sup> GIP-TRIAD Master's Degree in Agro-Biomedical Science, National Taiwan University, Taipei, Taiwan

\* Corresponding author E-mail: yicheun@ntu.edu.tw

† These authors contributed equally to this work.

Note – ESI updated 08/08/2023 to correct error in Figure 10(a) as requested by the authors.

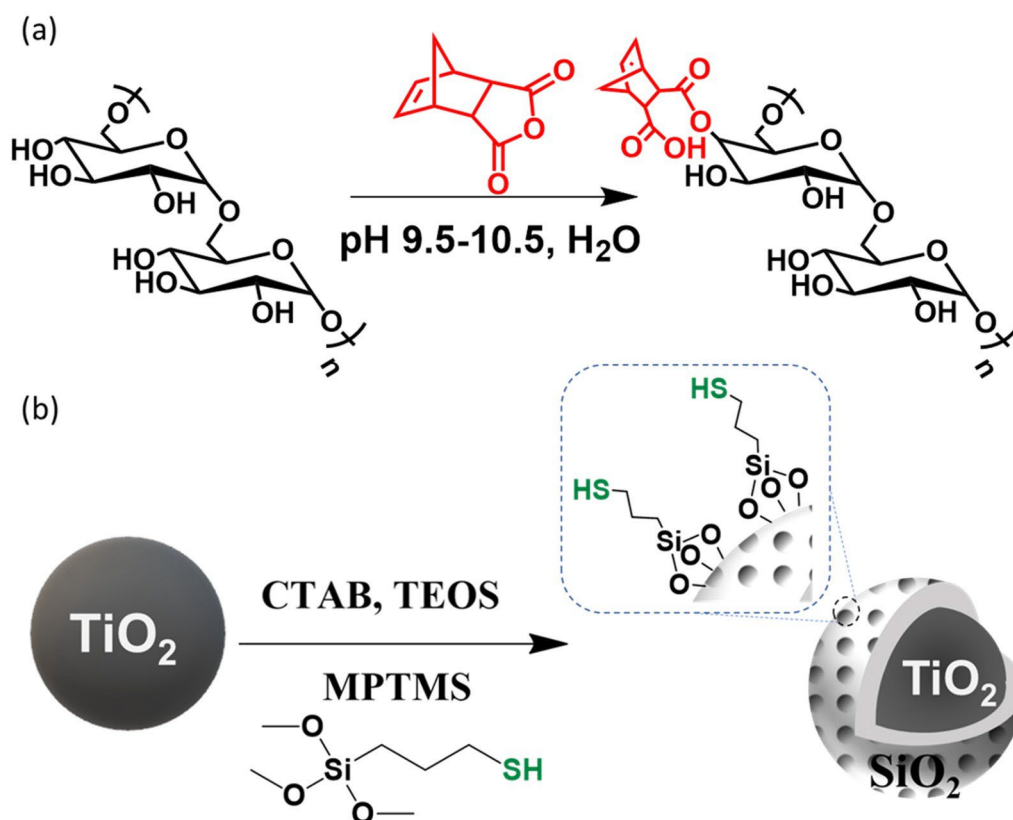

**Scheme S1.** Synthetic schemes of (a) Nor-Dex and (b)  $\text{TiO}_2@\text{MS-SH}$  NPs.

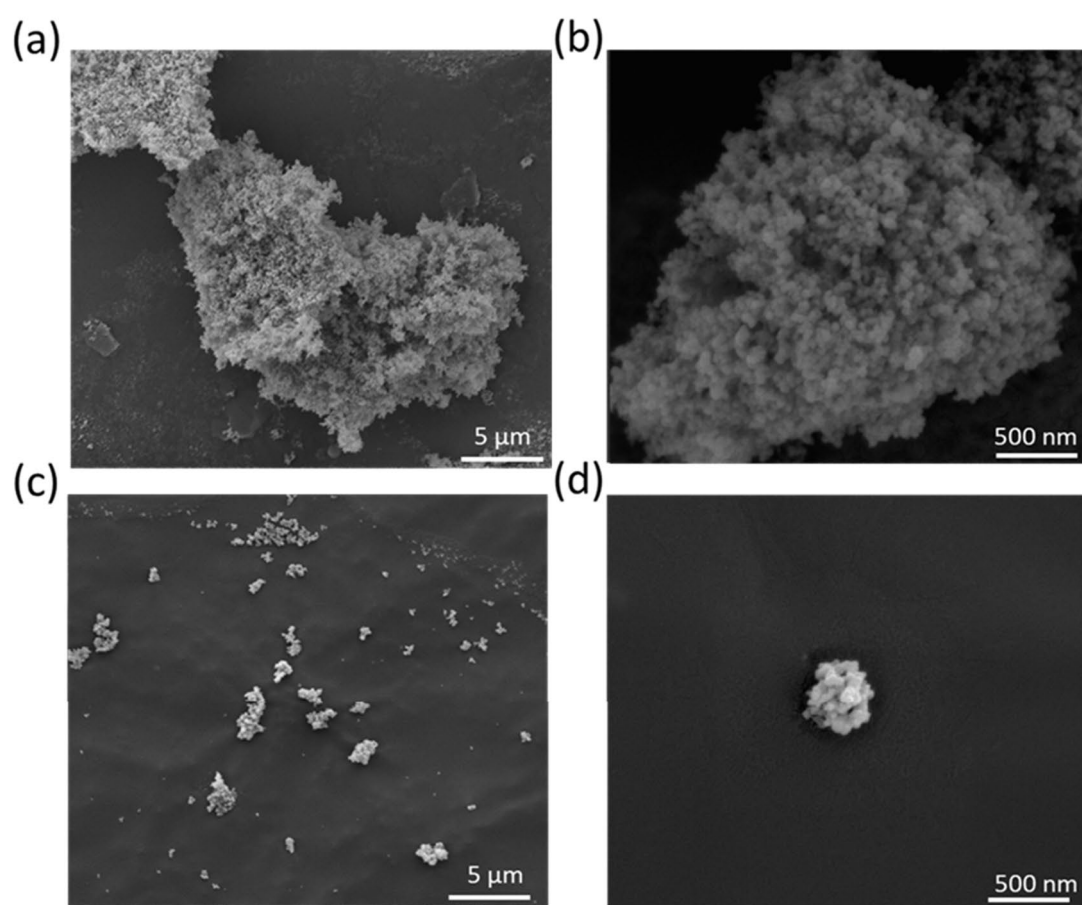

(e) **Left: pure  $\text{TiO}_2$     Right :  $\text{TiO}_2@\text{MS-SH}$**

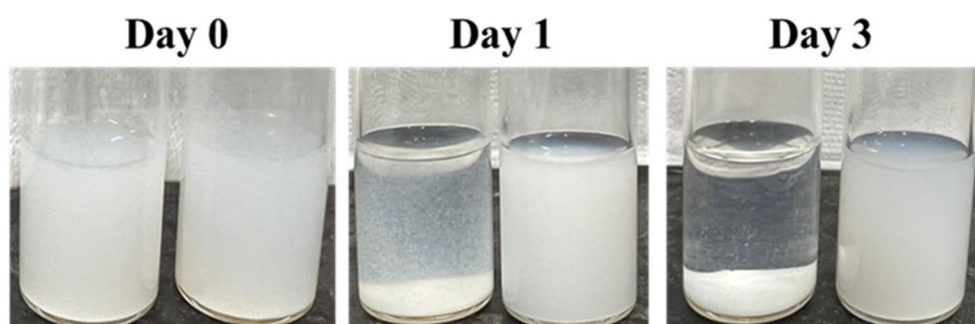

**Figure S1.** Representative SEM images of (a, b) pure  $\text{TiO}_2$  and (c, d)  $\text{TiO}_2@\text{MS-SH}$  NPs. (e) Photographs of NPs dispersed in aqueous solution (left:  $\text{TiO}_2$  NPs; right:  $\text{TiO}_2@\text{MS-SH}$  NPs).

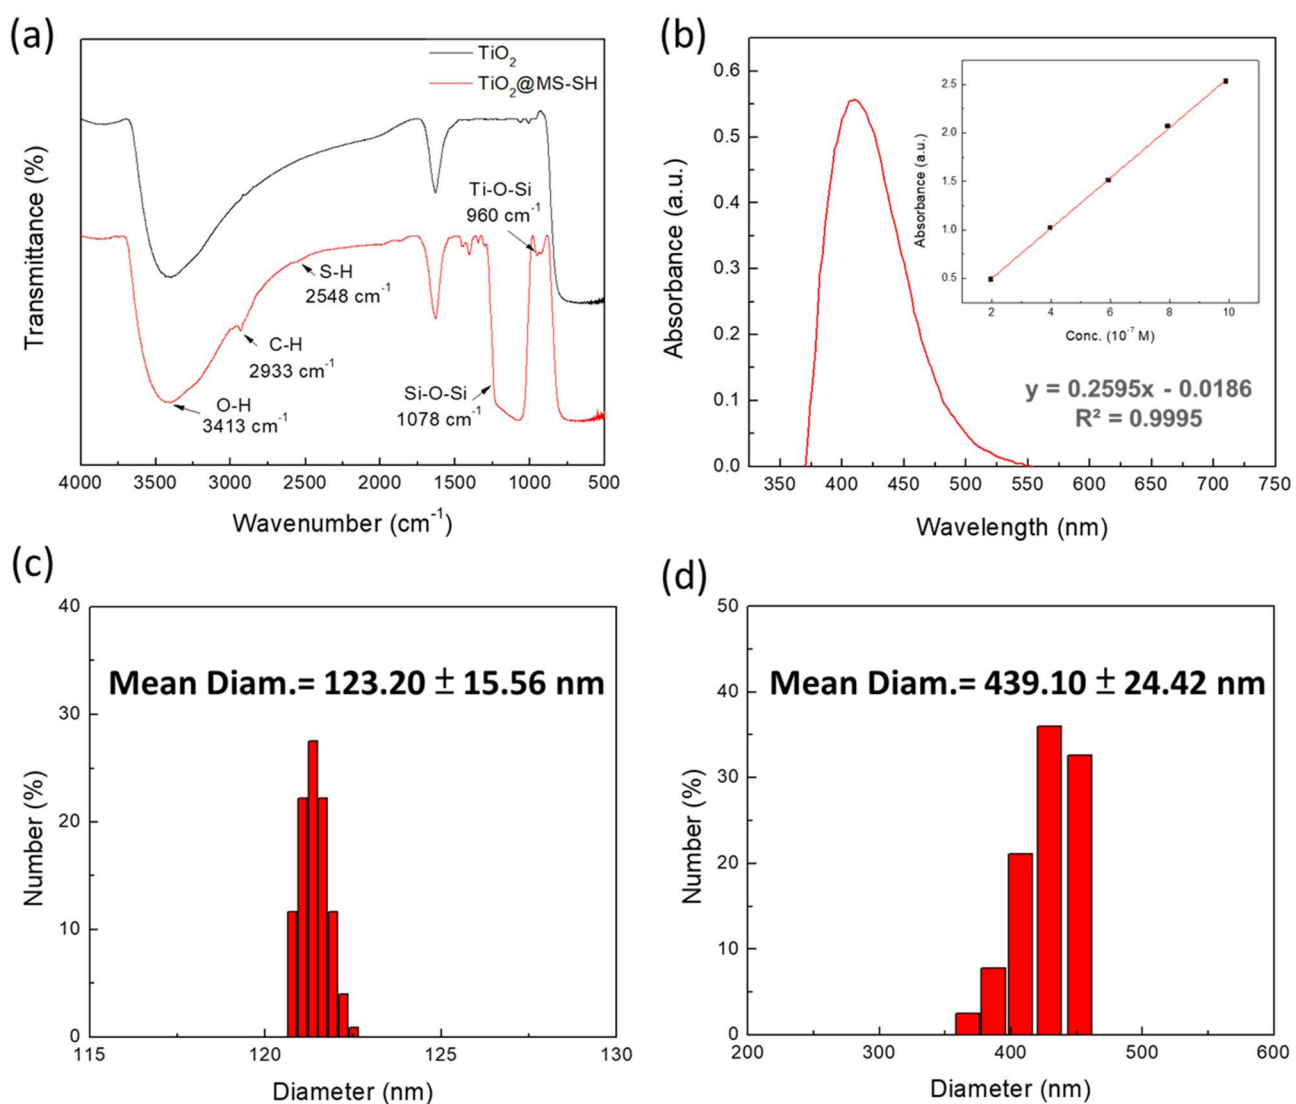

**Figure S2.** (a) FT-IR spectra of TiO<sub>2</sub> and TiO<sub>2</sub>@MS-SH NPs. (b) Quantification of the thiol group of the TiO<sub>2</sub>@MS-SH NPs using Ellman's assay. Hydrodynamic diameter distribution of (c) TiO<sub>2</sub> and (d) TiO<sub>2</sub>@MS-SH NPs.

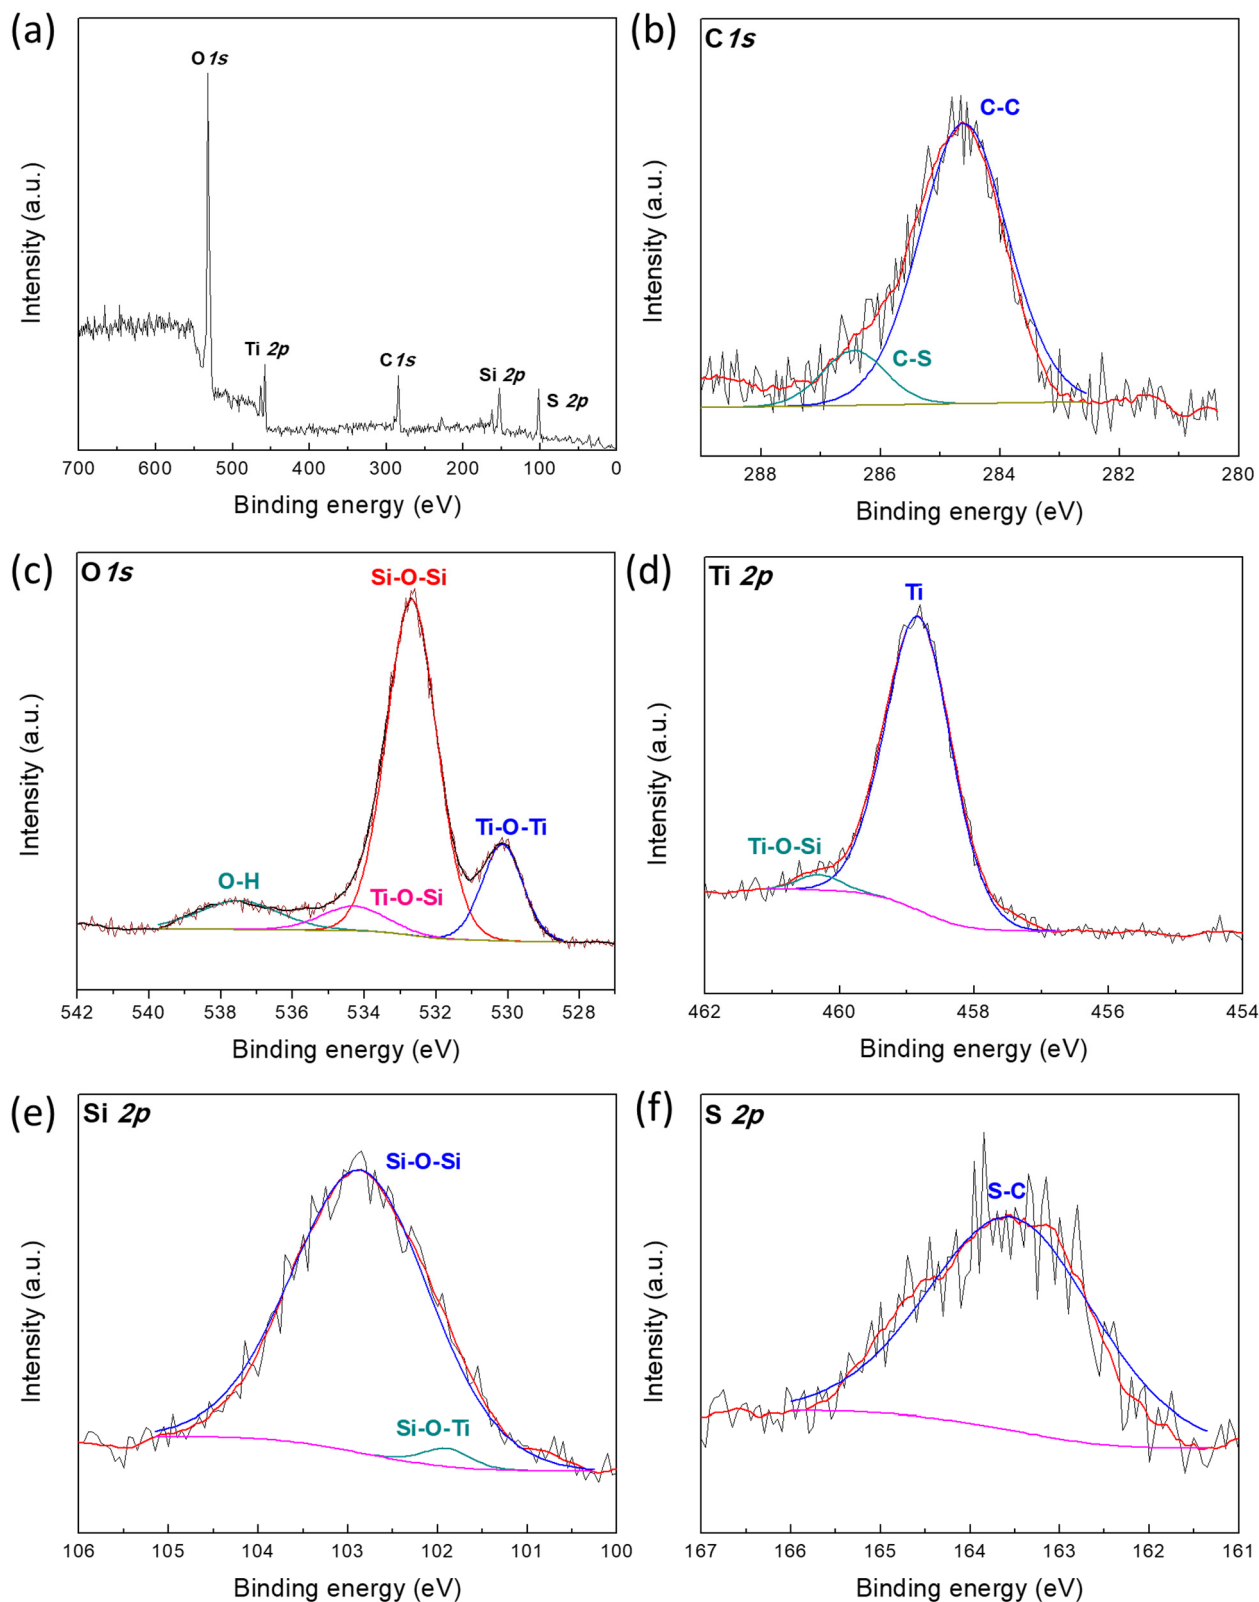

**Figure S3.** (a) XPS survey data of  $\text{TiO}_2@\text{MS-SH}$  NPs. High-resolution XPS spectra for (b) C 1s, (c) O 1s, (d) Ti 2p, (e) Si 2p, and (f) S 2p of  $\text{TiO}_2@\text{MS-SH}$  NPs.

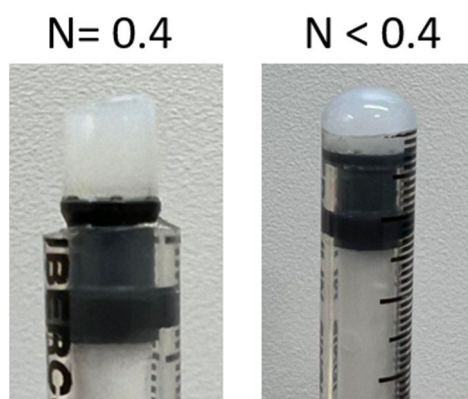

**Figure S4.** Stable gelation of  $\text{TiO}_2@\text{MS-SH}/\text{Nor-Dex}$  NC hydrogels was formed in the presence of DTT with thiol/norbornene ratio  $N = 0.4$ .

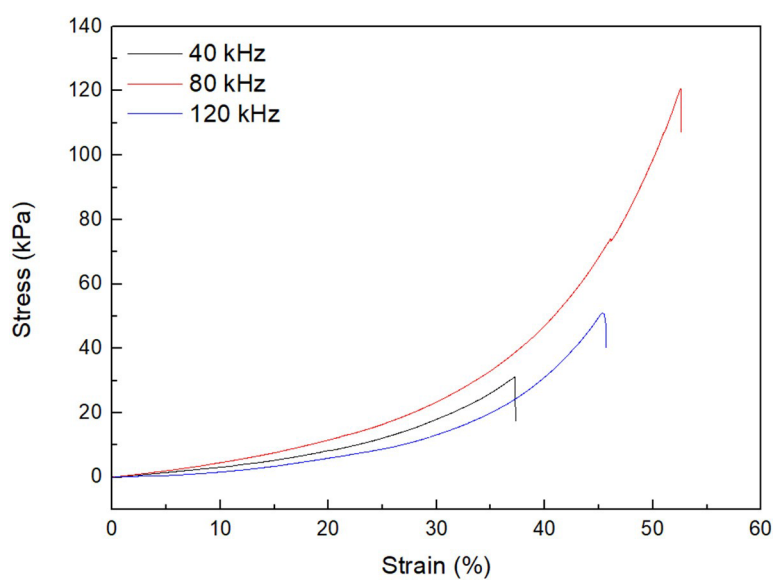

**Figure S5.** Representative stress-strain curves of  $\text{TiO}_2@\text{MS-SH}/\text{Nor-Dex}$  NC hydrogels prepared with varied ultrasound frequencies.

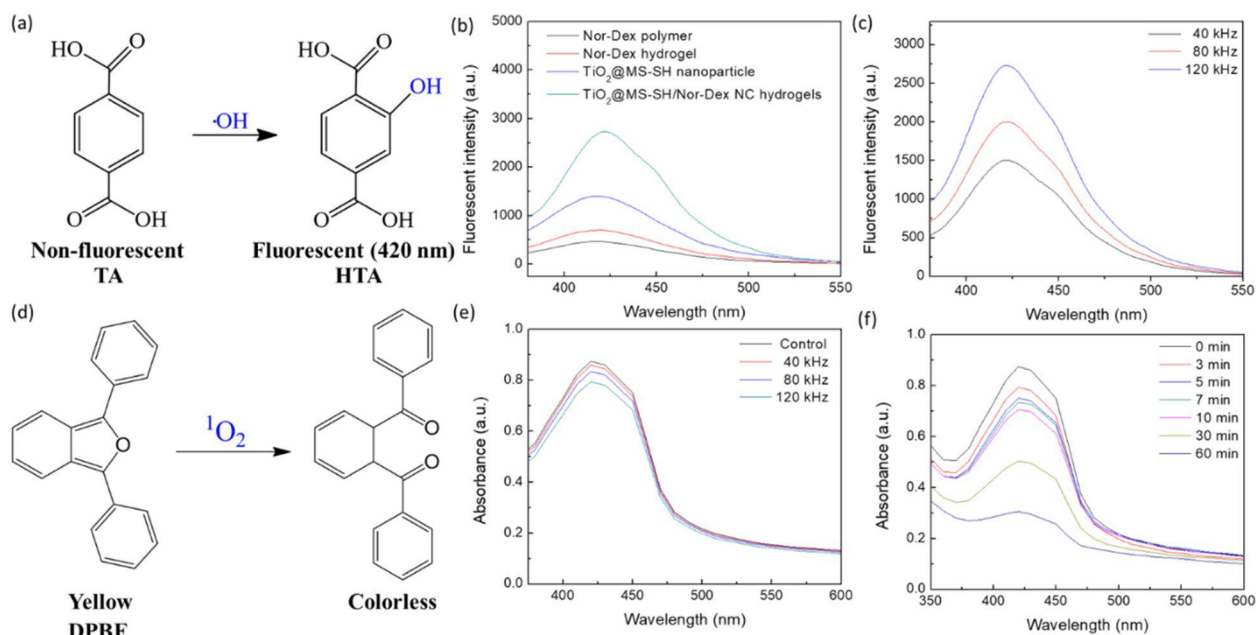

**Figure S6.** Measurements of ROS generation in the solution. (a) Hydroxyl radical ( $\cdot\text{OH}$ ) reaction with terephthalic acid (TA) and radical production under ultrasound irradiation. (b) Fluorescent spectra of TA acid with different samples (i.e., Nor-Dex polymer, Nor-Dex hydrogel (crosslinked with DTT),  $\text{TiO}_2\text{@MS-SH}$  NPs, and  $\text{TiO}_2\text{@MS-SH/Nor-Dex NC}$  hydrogels) under 120 kHz ultrasound irradiation. (c)  $\text{TiO}_2\text{@MS-SH/Nor-Dex NC}$  hydrogels under varied frequencies of ultrasound irradiation. (d) The reaction of singlet oxygen ( $^1\text{O}_2$ ) with DPBF. The decay UV-vis absorption curves of DPBF in aqueous solution as a function of the (e) varied frequencies and (f) ultrasound irradiation time.

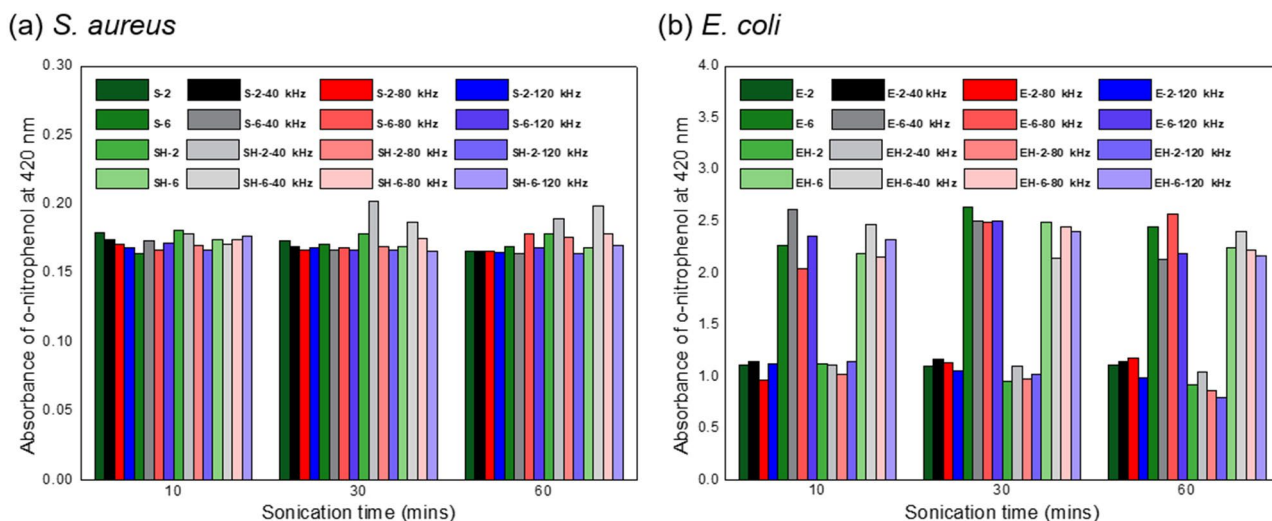

**Figure S7.** Cell membrane permeability of (a) *S. aureus* and (b) *E. coli* in the absence and presence of TiO<sub>2</sub>@MS-SH/Nor-Dex NC hydrogels under various ultrasound frequencies and sonication times. S: *S. aureus*; E: *E. coli*; SH: *S. aureus* incubated with hydrogel; EH: *E. coli* incubated with hydrogel. S-2 (or SH-2, E-2, and EH-2) and S-6 (or SH-6, E-6, and EH-6) indicate the absorbance of *S. aureus* (or *E. coli*) suspensions with ONPG obtained after the reaction time for 2 and 6 hr, respectively.

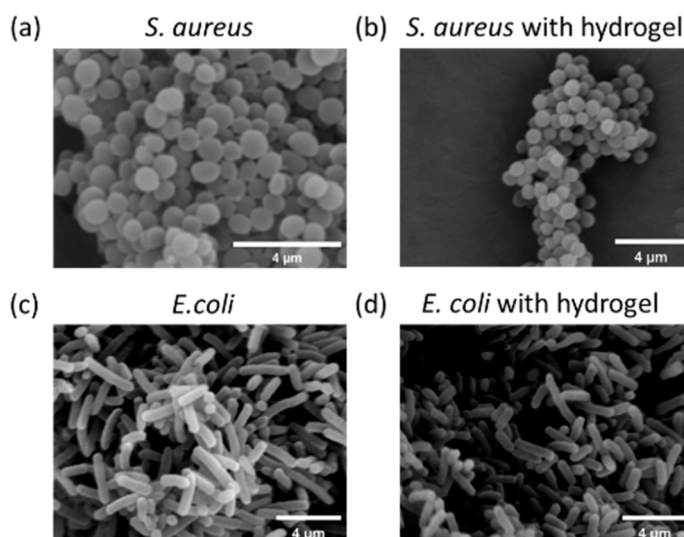

**Figure S8.** Representative SEM images of *S. aureus* in the (a) absence and (b) presence of TiO<sub>2</sub>@MS-SH/Nor-Dex NC hydrogels. Representative SEM images of *E. coli* in the (c) absence and (d) presence of TiO<sub>2</sub>@MS-SH/Nor-Dex NC hydrogels.

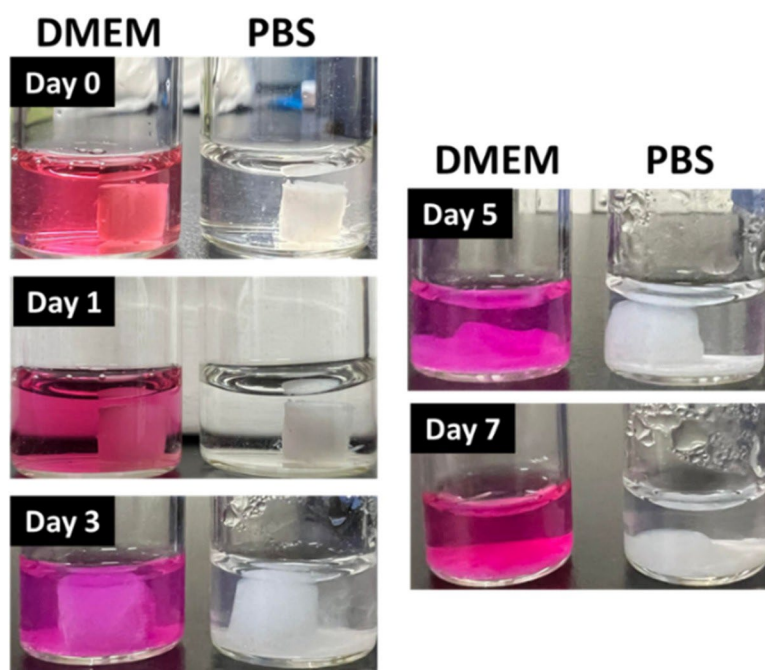

**Figure S9.** Stability test of TiO<sub>2</sub>@MS-SH/Nor-Dex NC hydrogels in serum-containing DMEM and PBS solution.

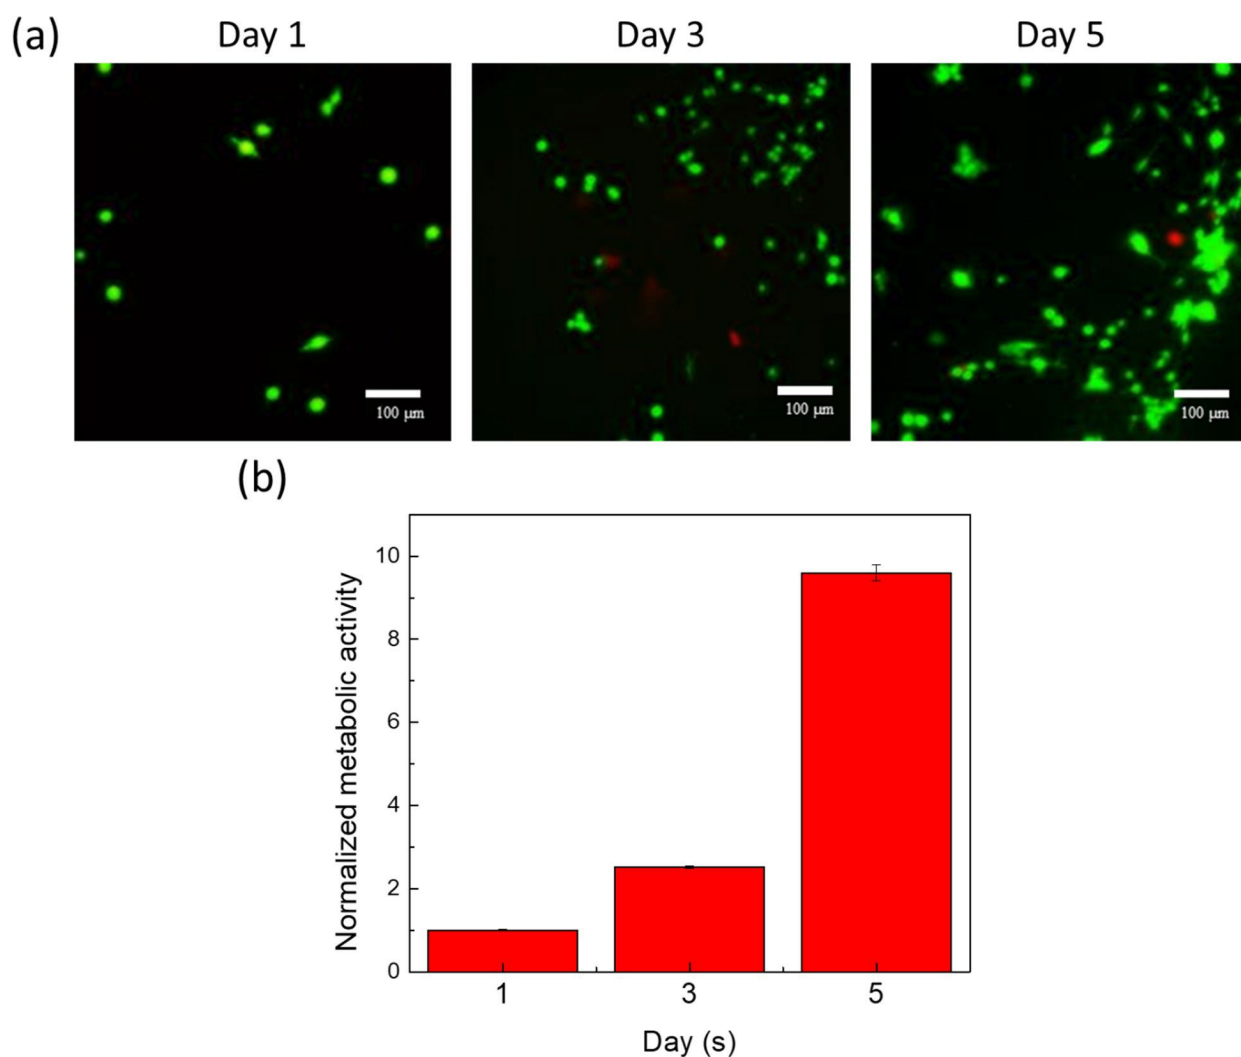

**Figure S10.** Cytocompatibility tests of the extract solutions obtained from the  $\text{TiO}_2@\text{MS-SH}/\text{Nor-Dex}$  NC hydrogels. (a) Fluorescence images of the live/dead staining of MEFs at different time points, where calcein-AM stained live cells green while ethidium homodimer-1 stained dead cells red. Scale bar: 100  $\mu\text{m}$ . (b) Metabolic activity of MEFs cultured in the extract solutions obtained from the NC hydrogels.

**Table S1.** Summary of the sample conditions of TiO<sub>2</sub>@MS-SH/Nor-Dex NC hydrogels used in the compression tests.

| <b>Tests <sup>a,b</sup></b>              | <b>TiO<sub>2</sub>@MS-SH<br/>concentration (wt%)</b> | <b>KPS<br/>concentration (wt%)</b> | <b>Frequency (kHz)</b> |
|------------------------------------------|------------------------------------------------------|------------------------------------|------------------------|
| TiO <sub>2</sub> @MS-SH<br>concentration | 0, 0.5, 1, 1.5                                       | 1                                  | 120                    |
| KPS<br>concentration                     | 1                                                    | 0, 0.25, 0.5, 1.25, 1.5            | 120                    |
| Frequency                                | 1                                                    | 1                                  | 40, 80, 120            |

<sup>a</sup> The Nor-Dex polymer was fixed at 10 wt% in each test.

<sup>b</sup> The thiol/norborene ratio was fixed at 0.4 in each test.
